# Supplementary material for: Boosting electrochemical methane conversion by oxygen evolution reactions on Fe–N–C single atom catalysts
Source: Royal Society of Chemistry journal article supplement (doi:10.1039/d3ee00027c), 2023-01-01
Supplement: d3ee00027c1.pdf [file d3ee00027c1.pdf]

## Supporting Information

# Boosting Electrochemical Methane Conversion by Oxygen Evolution Reactions on Fe-N-C Single Atom Catalysts

Cheolho Kim<sup>1,†</sup>, Heewon Min<sup>1,†</sup>, Junmin Kim<sup>1,†</sup> and Jun Hyuk Moon<sup>1\*</sup>

<sup>1</sup>Department of Chemical and Biomolecular Engineering, Institute of Emergent Materials,  
Sogang University, Baekbeom-ro 35, Mapo-gu, Seoul, 04107, Republic of Korea.

### Corresponding Author

\*Corresponding author, E-mail: [junhyuk@sogang.ac.kr](mailto:junhyuk@sogang.ac.kr)

<sup>†</sup>These authors equally contributed to this work

## Supplementary note #1

**Preparation of Fe-N-C SAC.** ZIF-8 was obtained by reaction of 2-methylimidazole (16 mmol, Sigma-Aldrich) and Zinc nitrate hexahydrate (4 mmol,  $\text{Zn}(\text{NO}_3)_2 \cdot 6\text{H}_2\text{O}$ , Sigma-Aldrich) in 45 ml methanol.<sup>1</sup> The addition of iron(III) acetylacetonate ( $\text{Fe}(\text{acac})_3$ , 0.4 mmol, Sigma-Aldrich) to this solution contained  $\text{Fe}(\text{acac})_3$  in the molecular cage of ZIF-8 during the self-assembled formation of ZIF-8. The diameter of the cage is 11.6 Å, which is comparable to the size of  $\text{Fe}(\text{acac})_3$  about 10 Å. As a result, one  $\text{Fe}(\text{acac})_3$  molecule is included in the cage. The reaction lasts about 3 hr with vigorous stirring. The precipitate,  $\text{Fe}(\text{acac})_3$ -impregnated ZIF-8, is dried in a 50 °C oven. The dried sample was annealed at 900°C in an Ar atmosphere. During this process, ZIF-8 was converted to nitrogen-doped carbon, and  $\text{Fe}(\text{acac})_3$  is thermally reduced to Fe, where Fe binds to the nitrogen site to form a Fe-N-C SAC.

**Analysis of electrochemical methane conversion.** The linear sweep voltammetry (LSV) was recorded using a potentiostat (Versastat Ametek): the scan rate was 0.02 V/s. The LSV was achieved using a three-electrode system; A Fe-N-C catalyst-coated carbon substrate (1x1 cm<sup>2</sup>) was used as a working electrode, Pt as a counter electrode, and a reversible hydrogen electrode (RHE) as a reference electrode. An electrolyte of 0.1M KOH was utilized. The saturation of methane in the electrolyte was achieved by aeration of methane using a microsparger; The aeration was carried out at 25 °C for 30 min. The electrochemical impedance spectrum (EIS) was recorded with an impedance analyzer (Versastat, Ametek); the frequency was scanned in the range 1MHz - 0.1Hz, and the voltage amplitude was set to 10mV. The electrochemical methane conversion was performed by immersing the Fe-N-C catalyst electrode, Pt counter electrode, and RHE reference electrode in a gas-tight reactor containing a methane-saturated electrolyte; The reaction temperature is 25 °C.

**Analysis of the product.** Gas Chromatography-Mass spectra were recorded using Gas Chromatography (GC-MS, 7890B-5977A, Agilent Technologies, USA) equipped with a mass selective detector MSD 5975 (electron impact ionization, EI, 70 eV, Agilent Technologies). A fused-silica capillary (DB-WAX, 0.25 µm thick poly(ethyleneglycol) coating, Agilent Technologies, USA) was exploited. Samples were injected by headspace sampling (1000 ul of a sample heated at 70 °C for 30 minutes); The injection temperature is 250 °C. The carrier gas is helium (1 mL/min, 99.999%), and the dilution ratio is 8:1 (sample: He). The oven temperature conditions are 5 min at 40 °C, 4 °C/min (100 °C), and 3 min at 240 °C (20 °C/min).

The production rate is calculated using the concentration of the products in the electrolyte measured by GC/MS, and the specific equation is as follows:

$$\text{Production rate } (\mu\text{mol} \cdot \text{g}_{\text{cat}}^{-1} \cdot \text{h}^{-1}) = \frac{C_{\text{product}} \times V \times \rho_{\text{product}}}{M_{\text{product}} \times m_{\text{Fe}}} \times 10^6$$

where  $C_{\text{product}}$  (ppm) is the concentration of the product ethanol,  $V$  (mL) is the volume of electrolyte,  $\rho_{\text{product}}$  ( $\text{g} \cdot \text{mL}^{-1}$ ) is the density of ethanol,  $M_{\text{product}}$  ( $\text{g} \cdot \text{mol}^{-1}$ ) is the molar mass of ethanol and  $m_{\text{Fe}}$  is the Fe single atom mass of working electrode.

**Analysis using isotopes.** The reaction was carried out using  $^{13}\text{CH}_4$  (Sigma-Aldrich, 99 %, 99 atom%  $^{13}\text{C}$ ), where a  $\text{D}_2\text{O}$ -based electrolyte is employed. The liquid product containing isotopes was recorded with NMR (Avance III HD 400 FT-NMR instrument, Bruker Biospin). The proton high power decoupling field strength was 11.7 (5.0  $\mu\text{s}$  length  $90^\circ$  1H pulse); The contact time was 4 ms at the Hartmann-Hahn matching condition 50 kHz, and the scan delay time was 3 s; The  $^{13}\text{C}$  chemical shift was analyzed for accuracy of  $\pm 0.5$  ppm; Tetramethylsilane (TMS) was applied as standard; The calibration was performed with the residual signal of 3-(trimethylsilyl)-1-propane sulfonic acid sodium salt (DSS) at  $\delta = 0.0$  ppm.

**Characterization.** The scanning electron microscope (SEM) was recorded using a JSM-7800F (JEOL). The transmission electron microscope (TEM) was recorded using a JEM-ARM200F (JEOL); The microscope was equipped with a spherical aberration corrector in the condenser lens (probe corrector). The high-angle annular dark field-scanning TEM (HAADF-STEM) was conducted by using a JEM-ARM200F (JEOL) microscope at an acceleration voltage of 200 kV. The EDS mapping was recorded using Oxford Instruments X-Max SDD. The XRD was recorded using a Rigaku miniflex-2005G303 X-ray diffractometer (Cu  $\text{K}\alpha$  radiation at 20 kV and 10 mA) in the 2 theta range of  $25$ - $65^\circ$ . The XPS was analyzed by using a Leybold photoelectron spectroscopy (Al  $\text{K}\alpha$  monochromatic beam). The X-ray absorption fine structure(XAFS) measurements were performed to probe the valence state and the coordination of iron species at the 7D XAFS beamline of the Pohang Light Source (PLS-II) in the 3.0 GeV storage ring. The XAFS spectra were collected in fluorescence mode. The obtained spectra were processed using Demeter software. Extended x-ray absorption fine structure (EXAFS) spectra were fitted using Artemis software in the  $k$ -space range of  $3$ - $14 \text{ \AA}^{-1}$ . Gas Chromatography-Mass spectra were recorded using Gas Chromatography(GC-MS, 7890B-5977A, Agilent Technologies, USA) equipped with a mass selective detector MSD 5975(electron impact ionization, EI, 70Ev, Agilent Technologies). A fused-silica capillary (DB-WAX,  $0.5 \mu\text{m}$  thick poly(ethyleneglycol) coating, Agilent Technologies, USA) was exploited. The sample injection temperature was set at  $250^\circ\text{C}$ . The carrier gas is helium( $1 \text{ mL/min}$ , 99.999%), and the dilution ratio is 10:1 (sample: He). The oven temperature conditions are 5 min at  $40^\circ\text{C}$ ,  $4^\circ\text{C/min}$  ( $100^\circ\text{C}$ ), and 3 min at  $240^\circ\text{C}$  ( $20^\circ\text{C/min}$ ).

**DFT calculation.** All calculations were performed using the Quantum ESPRESSO package based on density functional theory. The projector augmented (PAW) method<sup>2</sup>, and the Generalized gradient approximation (GGA) with the Perde-Burke-Ernzerhof (PBE) exchange-correlation functional was used.<sup>3</sup> Plane-wave basis set with a cutoff energy of 30 Ry was employed. The k-point set of (2 × 2 × 1) selected by the Monkhorst-Pack scheme was used to obtain Brillouin zone integration. For structure optimization, all ions were relaxed until a maximum force of 0.005 eV/Å. Specifically, a SAC was applied embedding the Fe-N4 site into periodic 6×6 graphene support with lattice parameters a=b=12.78 Å. The vacuum spacing was set to be 15 Å along the z direction to avoid the interactions between neighboring slabs. The standard Gibbs free energy change was obtained using the equation:  $\Delta G = \Delta E + \Delta ZPE - T\Delta S$  where  $\Delta E$ ,  $\Delta ZPE$ , and  $\Delta S$  were the reaction energy, the change in zero point energy, and the change in entropy, respectively.<sup>4</sup>

### Microkinetic analysis

We analyze the surface coverage of OER intermediates according to anodic potential on Fe-N-C single atom catalyst by microkinetic analysis. Under the condition that the OOH\* formation is the rate-determining step, we apply a steady-state approximation to the formation reactions of OH\* and O\*.

$$k_1\theta_* = k_{-1}\theta_{OH*}$$

$$k_2\theta_{OH*} = k_{-2}\theta_{O*}$$

Here,  $k_1$  and  $k_{-1}$  are rate constants for OH\* formation and its reverse reaction, respectively,  $k_2$  and  $k_{-2}$  are rate constants for O\* formation and its reverse reaction, respectively,  $\theta_{OH*}$  and  $\theta_{O*}$  stand for coverage for OH\* and O\*, respectively.

We also define equilibrium constants ( $K_1$  and  $K_2$ ) for these reactions.

$$K_1 = \frac{\theta_{OH*}}{\theta_*}$$

$$K_2 = \frac{\theta_{O*}}{\theta_{OH*}}$$

Rearranging these equations using the statement of site conservation ( $\sum_i \theta_i = 1$ ), we arrive at the equations for  $\theta_{OH*}$  and  $\theta_{O*}$  expressed as equilibrium constants.

Combining the Gibbs energy equation in the reaction ( $\Delta G_i = -RT\ln K_i$ ) and also the change in the Gibbs energy with the potential at the electrode ( $\Delta G_i(U) = \Delta G_i(0) \pm eU$ ), we get the equations for  $\theta_{OH*}$  and  $\theta_{O*}$  as a function of the electrode potential.

## Supplementary note #2

Mechanism for the ethanol-to-acetone conversion reaction.

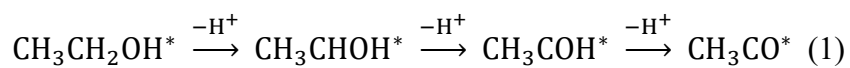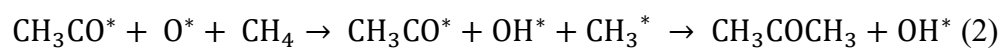

(1) Ethanol is converted to  $\text{CH}_3\text{CO}^*$  by a continuous deprotonation reaction. (2) The  $\text{CH}_3\text{CO}^*$  reacts with activated methane to form acetone.

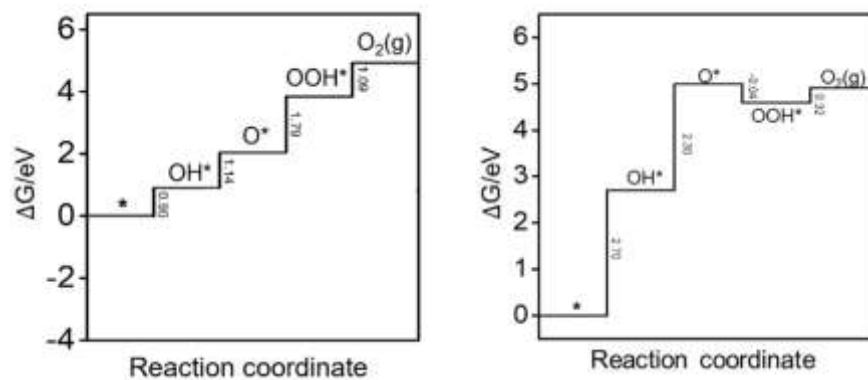

**Figure S1.** Comparison of energy profiles for OER on (left) Fe-N-C single atom catalysts and (right)  $\text{Fe}_2\text{O}_3$  catalysts

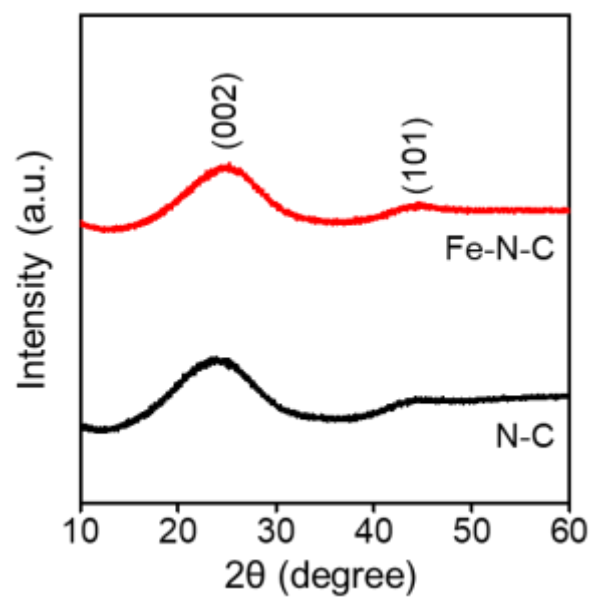

**Figure S2.** XRD spectra of Fe-N-C and N-C catalysts.

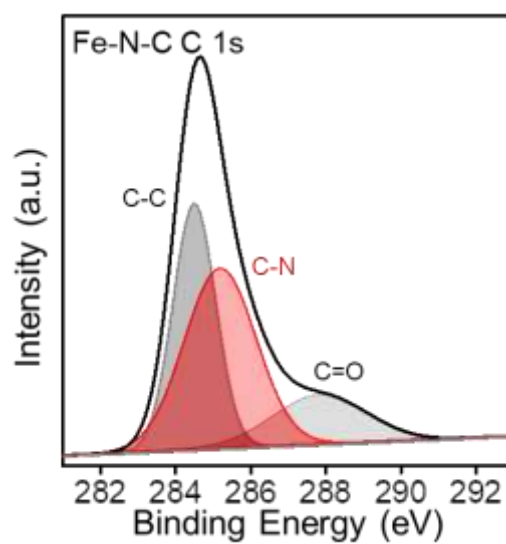

**Figure S3.** C 1s XPS spectrum of Fe-N-C catalysts. The spectrum is deconvoluted into peaks for C=O, C-N, and C=O. In particular, the C–N peaks indicate nitrogen doping on graphitic carbon.



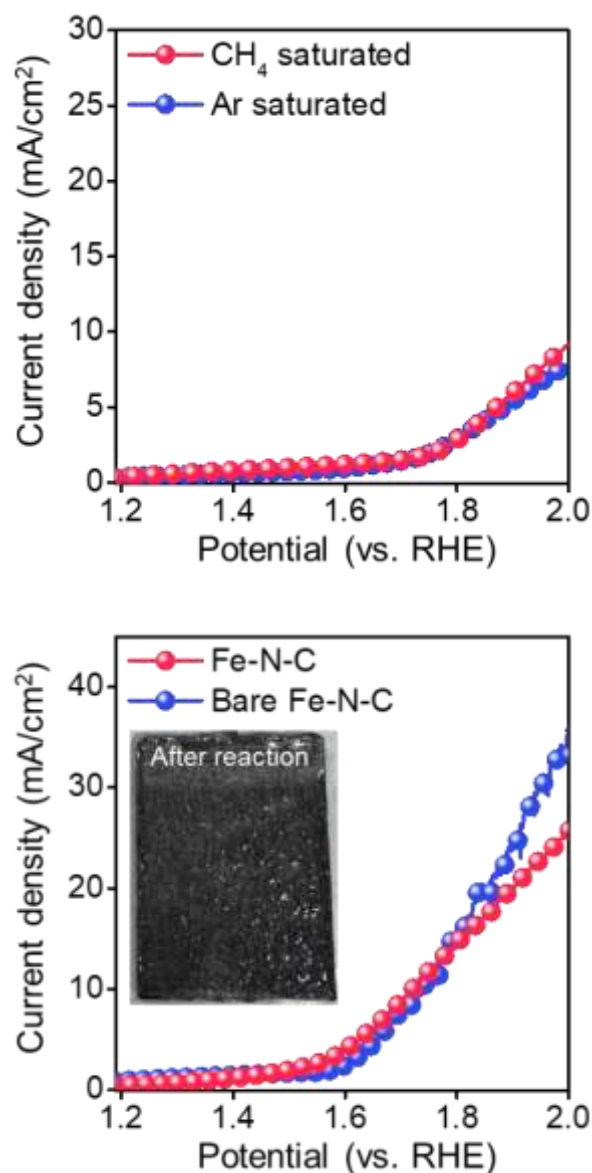

**Figure S4.** (Top) LSV profiles of Nafion-coated electrodes in methane and Ar-saturated electrolyte. (Bottom) LSV profile of Fe-N-C catalyst electrodes prepared without Nafion in methane-saturated electrolyte, with the LSV of Fe-N-C catalyst electrodes prepared with Nafion binder included for comparison. The bare Fe-N-C catalyst exhibits an unstable LSV profile. Inset image displays a digital camera image of the Fe-N-C catalyst electrode prepared without Nafion after the reaction, revealing the detachment of the catalyst from the graphite foil substrate.

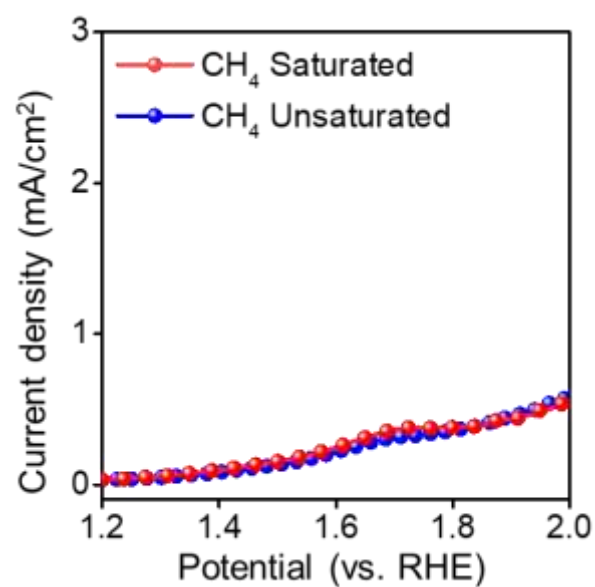

**Figure S5.** LSV curves of N-C with and without methane saturation in the electrolyte. Unlike the LSV for Fe-N-C catalysts, the LSV profile in methane-saturated electrolytes overlaps with that in methane-free electrolytes. As a result, the N-C catalyst shows no electrochemical activity.

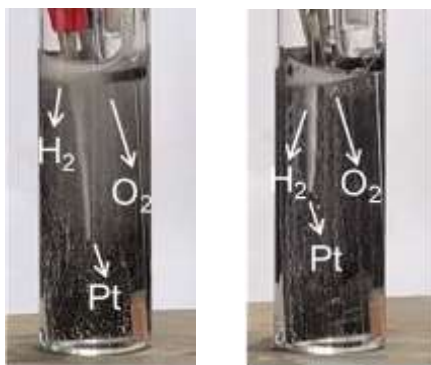

**Figure S6.** (left) Digital camera image of the electrodes at the application of  $2.0\text{ V}_{\text{RHE}}$  potential in a bare electrolyte not saturated with methane; vigorous bubbling of  $\text{H}_2$  and  $\text{O}_2$  gases is observed at the Pt counter electrode and Fe-N-C catalyst electrode, respectively. (right) (left) Digital camera image of the electrodes at the application of  $2.0\text{ V}_{\text{RHE}}$  potential in the methane-saturated electrolyte. The bubbling of  $\text{O}_2$  is relatively weak, revealing the formation of a liquid product by methane oxidation.

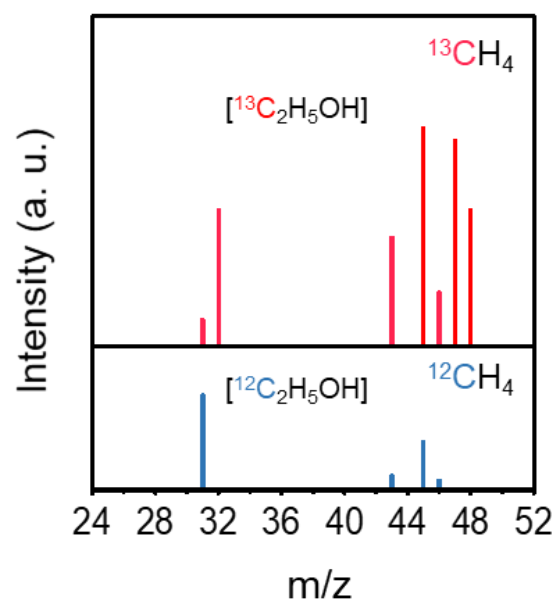

**Figure S7.** GC-MS spectrum of the ethanol product from the reaction with  $^{13}\text{CH}_4$ . The peaks shifted by m/z by one are identified, which correspond to ethanol containing  $^{13}\text{C}$ .

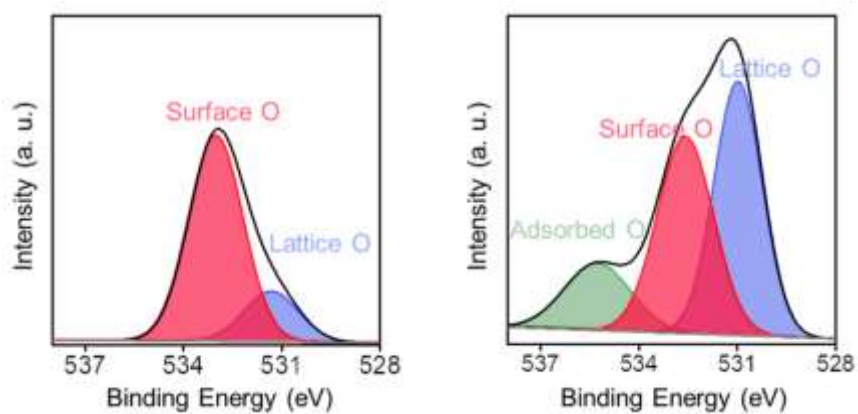

**Figure S8.** Ex-situ O 1s XPS spectra of Fe-N-C single atom catalysts (Left) with and (Right) without electrochemical potential applied. The Fe-N-C catalyst with applied potential clearly shows peaks for the adsorbed oxygen species, confirming the adsorption of O\* by electrochemical OER.

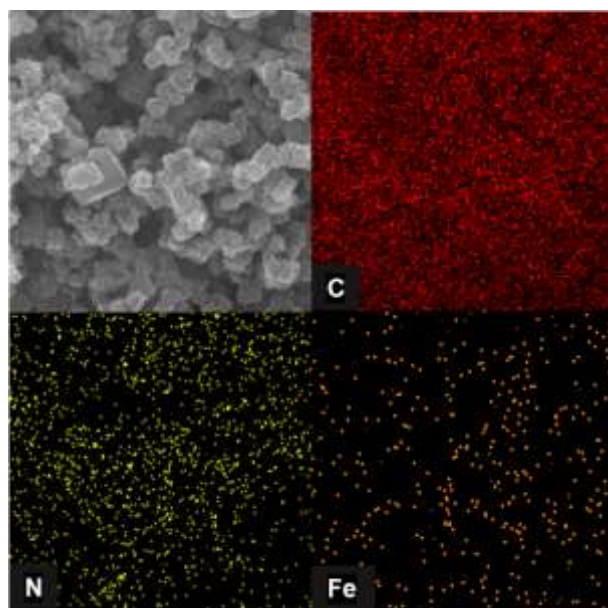

**Figure S9.** SEM / EDS mapping images of the Fe-N-C single atom catalysts coated on GDE.

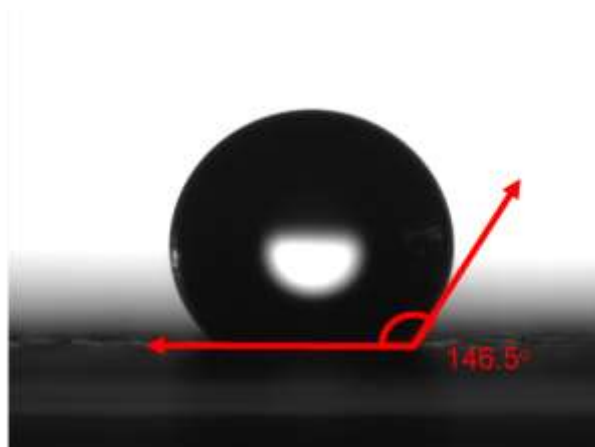

**Figure S10.** Contact angle photograph of Fe-N-C catalyst-coated GDE. The catalyst-coated GDE film exhibits very hydrophobicity with a contact angle of 147°.

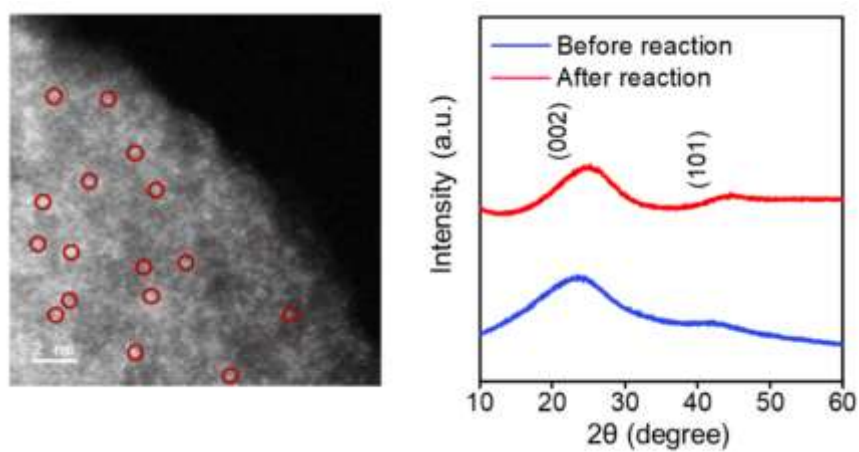

**Figure S11.** (a) HAADF-STEM image and XRD pattern of the Fe-N-C single atom catalyst after the long-term reaction.



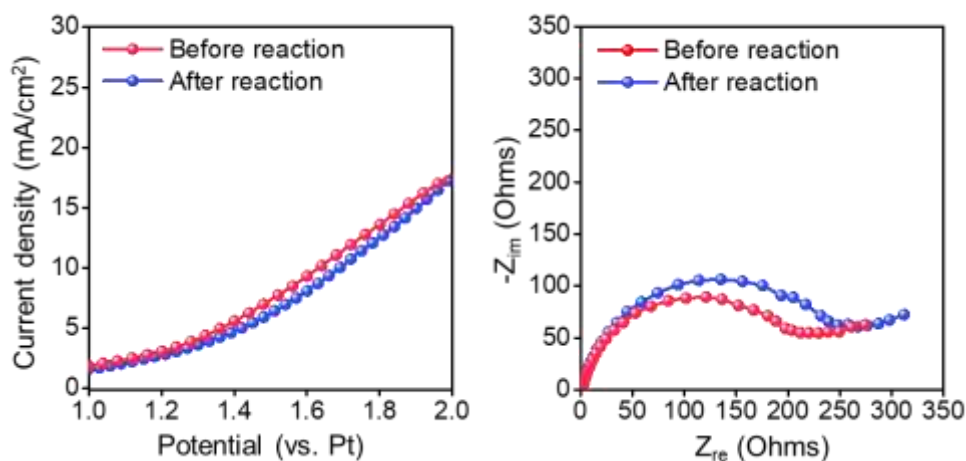

**Figure S12.** (Left) LSV and (Right) EIS profiles of the Fe-N-C single-atom catalyst electrode in the flow cell before and a 100-hour reaction. After the reaction, the LSV profile nearly overlaps with the pre-reaction profile, confirming the sustained electrochemical activity at the catalyst electrode during the reaction. In the EIS spectra, we compare the charge transfer resistance ( $R_{ct}$ ) values corresponding to the semicircle size; after the reaction,  $R_{ct}$  increases by approximately 10%; this may be associated with changes in wettability towards the electrolyte in the gas diffusion electrode.

**Table S1.** Comparison of FE in OER-assisted electrochemical methane conversion

| Catalysts                                        | Electrolyte | Temperature | Pressure<br>(atm) | Faradaic<br>Efficiency<br>(%) | Ref          |
|--------------------------------------------------|-------------|-------------|-------------------|-------------------------------|--------------|
| Fe-N-C<br>Single Atom                            | 0.1M KOH    | RT          | 1                 | 46.1                          | Our work     |
| Rh/ZnO                                           | 0.1M KOH    | RT          | 1                 | 10                            | <sup>5</sup> |
| Mg-MOF-74                                        | 1M KOH      | RT          | 1                 | 10.9                          | <sup>6</sup> |
| Cu <sub>2</sub> O <sub>3</sub> /TiO <sub>2</sub> | 0.1M KOH    | RT          | 1                 | 6                             | <sup>7</sup> |

**Table S2.** Comparison of production rates in electrochemical methane-alcohol conversion for various catalysts.

| Catalysts                                                         | Methane activation | Ethanol production rate<br>( $\mu\text{mol}\cdot\text{g}_{\text{cat}}^{-1}\cdot\text{hr}^{-1}$ ) | Ethanol selectivity (%)      | Reaction condition | Ref.     |
|-------------------------------------------------------------------|--------------------|--------------------------------------------------------------------------------------------------|------------------------------|--------------------|----------|
| Fe-N-C<br>Single atom                                             | Electrocatalytic   | 4668.3<br>11480.6 (flow cell)                                                                    | 85<br>87% (flow cell)        | 25°C, 1bar         | Our work |
| NiO/Ni                                                            | Electrocatalytic   | 25                                                                                               | 77                           | 25°C, 1bar         | 8        |
| NiO/ZrO <sub>2</sub>                                              | Electrocatalytic   | -                                                                                                | -                            | 40°C, 1bar         | 9        |
| ZrO <sub>2</sub> -NT/Co <sub>3</sub> O <sub>4</sub>               | Electrocatalytic   | 2416(propanol)                                                                                   | 34(propanol)<br>10(methanol) | 25°C, 1bar         | 10       |
| TiO <sub>2</sub> /RuO <sub>2</sub> /V <sub>2</sub> O <sub>5</sub> | Electrocatalytic   | 297(methanol)                                                                                    | 97                           | 25°C, 1bar         | 11       |
| Rh/ZnO                                                            | Electrocatalytic   | 789                                                                                              | 85                           | 25°C, 1bar         | 5        |
| CuO/CeO <sub>2</sub>                                              | Electrocatalytic   | 1009.8(methanol)                                                                                 | 83(methanol)                 | 25°C, 1bar         | 12       |

|                                                                         |                  |                      |                  |              |    |
|-------------------------------------------------------------------------|------------------|----------------------|------------------|--------------|----|
| Cu/ Al <sub>2</sub> O <sub>3</sub><br>@NH <sub>4</sub> BF <sub>4</sub>  | Electrocatalytic | 3095                 | 85               | 25°C, 1bar   | 13 |
| Co <sub>0.6</sub> Ni <sub>0.4</sub> Fe <sub>2</sub> O <sub>4</sub> -N/C | Electrocatalytic | 1925.4<br>(methanol) | 83<br>(methanol) | 20°C, 1bar   | 14 |
| IrO <sub>2</sub> /CuO                                                   | Thermocatalytic  | 290.7(methanol)      | 95(methanol)     | 150°C, 3bar  | 15 |
| Fe-MFI zeolite                                                          | Thermocatalytic  | 948.8(methanol)      | 85(methanol)     | 50°C, 30bar  | 16 |
| Pd-Au nanoparticles                                                     | Thermocatalytic  | 278(methanol)        | 73.2(methanol)   | 150°C, 33bar | 17 |
| Fe-ZSM-5                                                                | Thermocatalytic  | 1520(methanol)       | 6.9(methanol)    | 50°C, 31bar  | 18 |
| Hap                                                                     | Thermocatalytic  | 84.4(methanol)       | 61.5(methanol)   | 25°C, 1bar   | 19 |
| IrO <sub>2</sub> /ZnO/CuO                                               | Thermocatalytic  | 179(methanol)        | 59(methanol)     | 150°C, 3bar  | 20 |
| Au/BP nanosheets                                                        | Photocatalytic   | 56.8(methanol)       | 99(methanol)     | 90°C, 33bar  | 21 |
| FeOOH/<br>m-WO <sub>3</sub>                                             | Photocatalytic   | 238.6(methanol)      | 91(methanol)     | 25°C, 1bar   | 22 |
| TiO <sub>2</sub>                                                        | Photocatalytic   | 471(methanol)        | 83(methanol)     | 30°C, 30bar  | 23 |

|                      |                |                      |                  |            |    |
|----------------------|----------------|----------------------|------------------|------------|----|
| Cu-PCN               | Photocatalytic | 106                  | 81               | 25°C, 1bar | 24 |
| BiOCl-O <sub>v</sub> | Photocatalytic | 180.75<br>(methanol) | 80<br>(methanol) | 25°C, 1bar | 25 |

---

## References

1. Y. Chen, S. Ji, Y. Wang, J. Dong, W. Chen, Z. Li, R. Shen, L. Zheng, Z. Zhuang and D. Wang, *Angew. Chem.*, 2017, **129**, 7041-7045.
2. B. Hammer, L. B. Hansen and J. K. Nørskov, *Phys. Rev. B*, 1999, **59**, 7413-7421.
3. W. Luo, C. Jiang, Y. Li, S. A. Shevlin, X. Han, K. Qiu, Y. Cheng, Z. Guo, W. Huang and J. Tang, *J. Mater. Chem. A*, 2017, **5**, 2021-2028.
4. M. Li, L. Zhang, Q. Xu, J. Niu and Z. Xia, *J. Catal.*, 2014, **314**, 66-72.
5. Z. Xie, M. Chen, Y. Chen, A. Guan, Q. Han and G. Zheng, *J. Phys. Chem. C*, 2021, **125**, 13324-13330.
6. M. Chen, X. Lv, A. Guan, C. Peng, L. Qian and G. Zheng, *J. Colloid Interface Sci.*, 2022, **623**, 348-353.
7. A. Prajapati, B. A. Collins, J. D. Goodpaster and M. R. Singh, *Proc. Natl. Acad. Sci.*, 2021, **118**, e2023233118.
8. Y. Song, Y. Zhao, G. Nan, W. Chen, Z. Guo, S. Li, Z. Tang, W. Wei and Y. Sun, *Appl. Catal. B*, 2020, **270**, 118888.
9. N. Spinner and W. E. Mustain, *J. Electrochem. Soc.*, 2013, **160**, F1275.
10. C. Oh, J. Kim, Y. J. Hwang, M. Ma and J. H. Park, *Appl. Catal. B*, 2021, **283**, 119653.
11. R. S. Rocha, R. M. Reis, M. R. Lanza and R. Bertazzoli, *Electrochim. Acta*, 2013, **87**, 606-610.
12. H. Wang, J. Chen, Y. Lin, X. Wang, J. Li, Y. Li, L. Gao, L. Zhang, D. Chao, X. Xiao and J.-M. Lee, *Adv. Mater.*, 2021, **33**, 2008422.
13. E. Ponticorvo, M. Iuliano, C. Cirillo and M. Sarno, *Chem. Eng. J.*, 2023, **451**, 139074.
14. L. Zeng, A. R. Thiruppathi, J. van der Zalm, T. Shi and A. Chen, *J. Mater. Chem. A*, 2022, **10**, 15012-15025.
15. L. Yang, J. Huang, R. Ma, R. You, H. Zeng and Z. Rui, *ACS Energy Lett.*, 2019, **4**, 2945-2951.
16. P. Xiao, Y. Wang, T. Nishitoba, J. N. Kondo and T. Yokoi, *Chem. Commun.*, 2019, **55**, 2896-2899.
17. Y. He, J. Liang, Y. Imai, K. Ueda, H. Li, X. guo, G. Yang, Y. Yoneyama and N. Tsubaki, *Catal. Today*, 2020, **352**, 104-110.
18. M. S. Kim, K. H. Park, S. J. Cho and E. D. Park, *Catal. Today*, 2021, **376**, 113-118.
19. Y. Zhou, H. Wang, X. Liu, S. Qiao, D. Shao, J. Zhou, L. Zhang and W. Wang, *Nano Energy*, 2021, **79**, 105449.
20. L. Yang, J. Huang, J. Cen, D.-L. Chen, H. Zeng, Z. Rui, R. Luque and P. Duan, *J. Mater. Chem. A*, 2021, **9**, 7094-7101.
21. L. Luo, J. Luo, H. Li, F. Ren, Y. Zhang, A. Liu, W.-X. Li and J. Zeng, *Nat. Commun.*, 2021, **12**, 1-10.
22. J. Yang, J. Hao, J. Wei, J. Dai and Y. Li, *Fuel*, 2020, **266**, 117104.
23. Y. Zeng, H. C. Liu, J. S. Wang, X. Y. Wu and S. L. Wang, *Catal. Sci. Technol.*, 2020,

**10**, 2329-2332.

24. Y. Zhou, L. Zhang and W. Wang, *Nat. Commun.*, 2019, **10**, 1-8.
25. J. Wang, R. Li, D. Zeng, W. Wang, Y. Zhang, L. Zhang and W. Wang, *Chem. Eng. J.*, 2023, **452**, 139505.
